# Supplementary material
Source: MDPI journal article supplement (https://www.mdpi.com/2673-4079/3/1/1)
Supplement: s1 [file s1]

# Supplementary Materials

Efficient extraction of the RuBisCO enzyme from  
spinach leaves using aqueous solutions of  
biocompatible ionic liquids

*Ana I. Valente<sup>1</sup>, Ana M. Ferreira<sup>1</sup>, Mafalda R. Almeida<sup>1</sup>, Aminou Mohamadou<sup>2</sup>, Mara  
G. Freire<sup>1</sup>, and Ana P.M. Tavares<sup>1,\*</sup>*

<sup>1</sup>CICECO - Aveiro Institute of Materials, Department of Chemistry, University  
of Aveiro, 3810-193 Aveiro, Portugal

<sup>2</sup>Institut de Chimie Moléculaire de Reims (ICMR), UMR CNRS 7312, Université  
de Reims Cham-pagne-Ardenne, Moulin de la Housse, BP 1039-51687 Reims  
Cedex 2, France

\* Corresponding author. Tel: +351 234 401 520; E-mail address: aptavares@ua.pt

**Table S1.**  $2^3$  factorial planning for each IL ([Ch]Cl and [Ch][Ac]).

| Experiment | X <sub>1</sub> | X <sub>2</sub> | X <sub>3</sub> |
|------------|----------------|----------------|----------------|
| 1          | -1             | -1             | -1             |
| 2          | 1              | -1             | -1             |
| 3          | -1             | 1              | -1             |
| 4          | 1              | 1              | -1             |
| 5          | -1             | -1             | 1              |
| 6          | 1              | -1             | 1              |
| 7          | -1             | 1              | 1              |
| 8          | 1              | 1              | 1              |
| 9          | -1.68          | 0              | 0              |
| 10         | 1.68           | 0              | 0              |
| 11         | 0              | -1.68          | 0              |
| 12         | 0              | 1.68           | 0              |
| 13         | 0              | 0              | -1.68          |
| 14         | 0              | 0              | 1.68           |
| 15         | 0              | 0              | 0              |
| 16         | 0              | 0              | 0              |
| 17         | 0              | 0              | 0              |
| 18         | 0              | 0              | 0              |
| 19         | 0              | 0              | 0              |
| 20         | 0              | 0              | 0              |

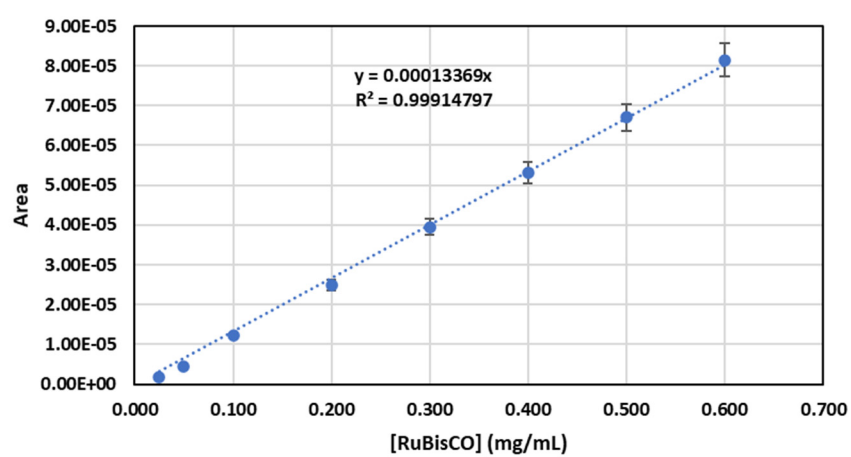

**Figure S1.** Calibration curve used to determine the concentration of RuBisCO in the samples. Equation:  $\text{Area} = 1.3369 \times 10^{-4} [\text{RuBisCO}]$  and  $R^2 = 0.9991$ .

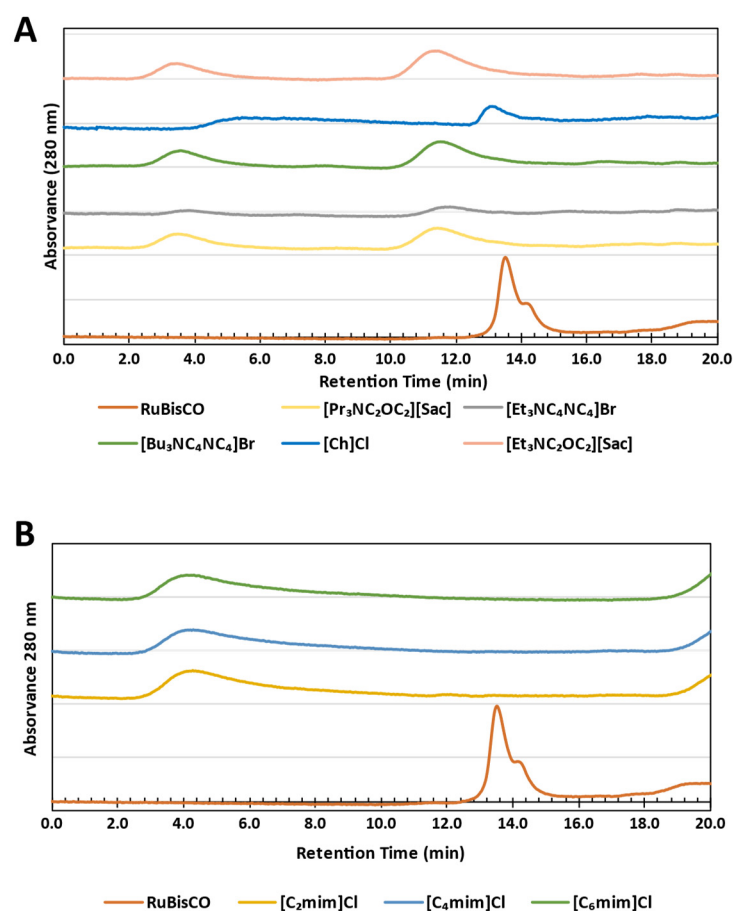

**Figure S2.** SE-HPLC spectra of aqueous solutions of biocompatible ILs (A) and imidazolium-based ILs (B) after RuBisCO's extraction from spinach leaves with an IL concentration of 3.3 mM. RuBisCO chromatogram presents 2 peaks. The peak with a retention time of ~13.4 min corresponds to the RuBisCO and the peak at ~14.3 min corresponds to impurities. The peaks with retention times of 4.0 and 11.6 min correspond to protein aggregates.

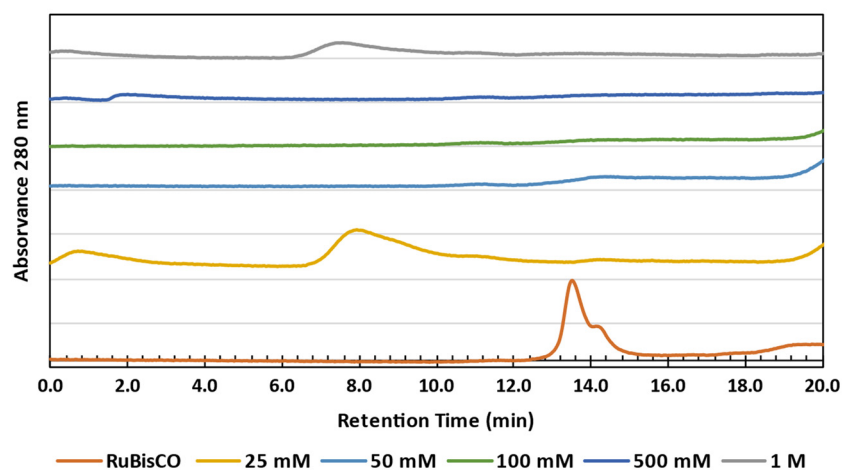

**Figure S3.** SE-HPLC spectra of aqueous solutions of [Ch][DHP] after RuBisCO's extraction from spinach leaves with different IL concentrations. RuBisCO chromatogram presents 2 peaks. The peak with a retention time of ~13.4 min corresponds to the RuBisCO and at ~14.3 min corresponds to impurities. The extracts with IL concentrations of 25 mM, 500 mM and 1 M present peaks with lower retention times (1.2, 2.0 and 8.0 min) corresponding to protein aggregates.

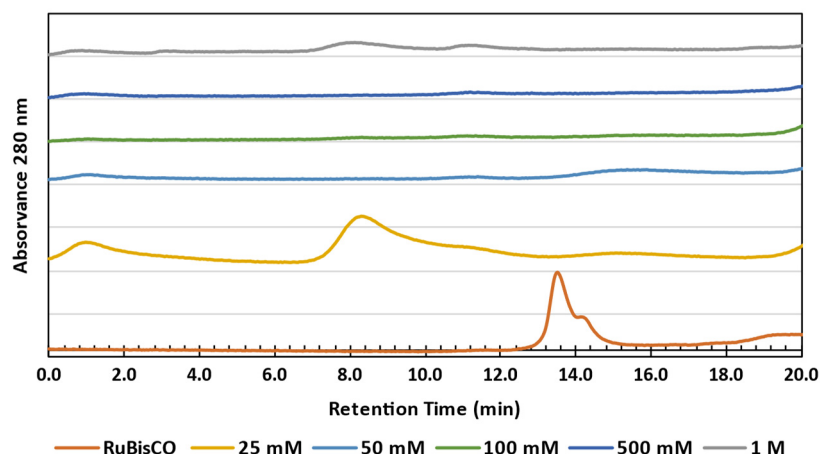

**Figure S4.** SE-HPLC spectra of aqueous solutions of [Ch][DHC] after RuBisCO's extraction from spinach leaves with different IL concentrations. RuBisCO chromatogram presents 2 peaks. The peak with a retention time of ~13.4 min corresponds to the RuBisCO and at ~14.3 min corresponds to impurities. The extract with IL concentrations of 25 mM and 1M present only peaks with lower retention times (1.2 and 8.0 min) corresponding to protein aggregates.

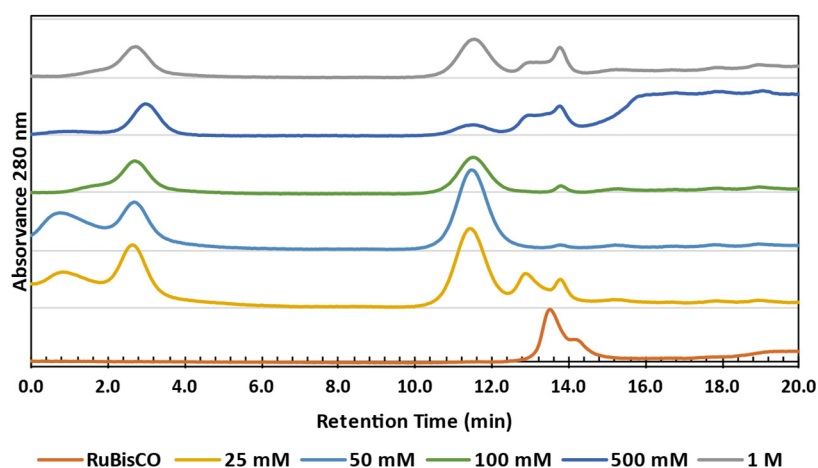

**Figure S5.** SE-HPLC spectra of aqueous solutions of [Ch]Cl after RuBisCO's extraction from spinach leaves with different IL concentrations. RuBisCO control chromatogram presents 2 peaks. The peak with a retention time of ~13.4 min corresponds to the RuBisCO and at ~14.3 min corresponds to impurities. The other peaks with lower retention times (1.2, 2.4, 11.6 and 12.6 min) correspond to protein aggregates.

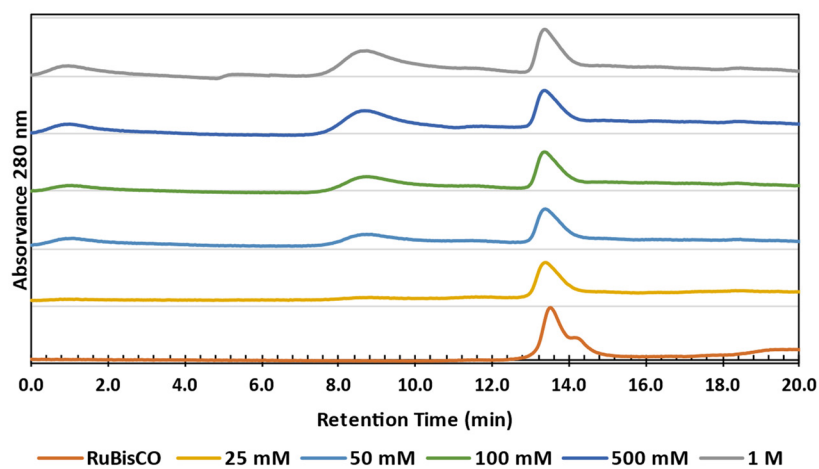

**Figure S6.** SE-HPLC spectra of aqueous solutions of [Ch][Ac] after RuBisCO's extraction from spinach leaves with different IL concentrations. RuBisCO chromatogram presents 2 peaks. The peak with a retention time of ~13.4 min corresponds to the RuBisCO and at ~14.3 min corresponds to impurities. All the extracts present a characteristic peak for RuBisCO. The peaks with a lower retention time (1.2 and 8.8 min) correspond to protein aggregates.



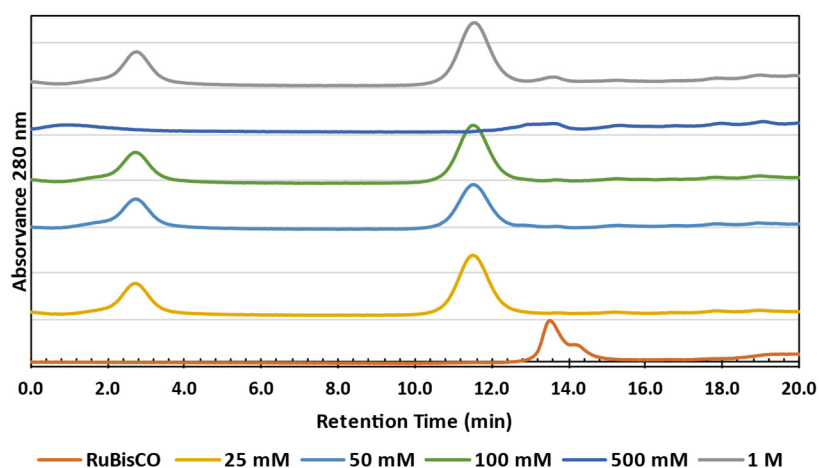

**Figure S7.** SE-HPLC spectra of aqueous solutions of [Ch]Br after RuBisCO's extraction from spinach leaves with different IL concentrations. RuBisCO chromatogram presents 2 peaks. The peak with a retention time of ~13.4 min corresponds to the RuBisCO and the peak at ~14.3 min corresponds to impurities. The peaks with lower retention times (2.8 and 11.6 min) correspond to protein aggregates.

**Table S2.** pH values of the IL aqueous solutions and of the extracts.

| [IL] (mM) | [Ch]Cl                     |                        | [Ch]Br                     |                        | [Ch][Ac]                   |                        | [Ch][DHC]                  |                        | [Ch][DHP]                  |                        |
|-----------|----------------------------|------------------------|----------------------------|------------------------|----------------------------|------------------------|----------------------------|------------------------|----------------------------|------------------------|
|           | pH <sub>IL solutions</sub> | pH <sub>extracts</sub> |
| 25        | 5.29                       | 6.45                   | 5.70                       | 6.39                   | 6.16                       | 6.30                   | 3.77                       | 4.13                   | 3.47                       | 5.37                   |
| 50        | 3.97                       | 6.23                   | 4.07                       | 6.29                   | 6.03                       | 6.12                   | 3.72                       | 3.93                   | 3.43                       | 5.07                   |
| 100       | 4.35                       | 6.28                   | 5.28                       | 6.26                   | 5.99                       | 6.03                   | 3.69                       | 3.82                   | 3.42                       | 4.42                   |
| 500       | 5.70                       | 6.23                   | 5.12                       | 6.15                   | 6.03                       | 6.03                   | 3.66                       | 3.72                   | 3.41                       | 3.65                   |
| 1000      | 4.54                       | 6.11                   | 4.87                       | 6.06                   | 6.10                       | 6.10                   | 3.70                       | 3.74                   | 3.58                       | 3.70                   |

**Table S3.** Experimental data and response surface predicted values of the factorial planning for RuBisCOs' concentration using [Ch]Cl aqueous solutions.

| Nº | pH   | S/L<br>RATIO | C (M) | Predicted<br>Results | Observed<br>Results | Relative<br>deviation<br>(%) |
|----|------|--------------|-------|----------------------|---------------------|------------------------------|
| 1  | 4.50 | 0.05         | 0.80  | 0.516                | 0.519               | 0.530                        |
| 2  | 9.50 | 0.05         | 0.80  | 0.526                | 0.581               | 9.49                         |
| 3  | 4.50 | 0.15         | 0.80  | 1.25                 | 1.34                | 6.74                         |
| 4  | 9.50 | 0.15         | 0.80  | 1.37                 | 1.37                | -0.036                       |
| 5  | 4.50 | 0.05         | 2.2   | 0.410                | 0.370               | -10.9                        |
| 6  | 9.50 | 0.05         | 2.2   | 0.541                | 0.410               | -31.9                        |
| 7  | 4.50 | 0.15         | 2.2   | 1.12                 | 1.03                | -9.36                        |
| 8  | 9.50 | 0.15         | 2.2   | 1.37                 | 1.33                | -3.29                        |
| 9  | 2.80 | 0.10         | 1.5   | 0.703                | 0.709               | 0.892                        |
| 10 | 11.2 | 0.10         | 1.5   | 0.921                | 0.973               | 5.31                         |
| 11 | 7.00 | 0.02         | 1.5   | 0.189                | 0.237               | 20.2                         |
| 12 | 7.00 | 0.18         | 1.5   | 1.50                 | 1.51                | 0.673                        |
| 13 | 7.00 | 0.10         | 0.32  | 1.05                 | 0.940               | -11.4                        |
| 14 | 7.00 | 0.10         | 2.7   | 0.956                | 1.12                | 14.8                         |
| 15 | 7.00 | 0.10         | 1.5   | 0.854                | 0.898               | 4.90                         |
| 16 | 7.00 | 0.10         | 1.5   | 0.854                | 0.901               | 5.21                         |
| 17 | 7.00 | 0.10         | 1.5   | 0.854                | 0.744               | -14.9                        |
| 18 | 7.00 | 0.10         | 1.5   | 0.854                | 0.777               | -9.98                        |
| 19 | 7.00 | 0.10         | 1.5   | 0.854                | 0.905               | 5.59                         |
| 20 | 7.00 | 0.10         | 1.5   | 0.854                | 0.890               | 4.04                         |

**Table S4.** Experimental data and response surface predicted values of the factorial planning for RuBisCOs' extraction yield using [Ch]Cl aqueous solutions.

| Nº | pH   | S/L<br>RATIO | C (M) | Predicted<br>Results | Observed<br>Results | Relative<br>deviation<br>(%) |
|----|------|--------------|-------|----------------------|---------------------|------------------------------|
| 1  | 4.50 | 0.05         | 0.80  | 8.73                 | 7.36                | -18.7                        |
| 2  | 9.50 | 0.05         | 0.80  | 10.2                 | 8.80                | -15.5                        |
| 3  | 4.50 | 0.15         | 0.80  | 6.36                 | 6.00                | -5.96                        |
| 4  | 9.50 | 0.15         | 0.80  | 7.41                 | 6.72                | -10.3                        |
| 5  | 4.50 | 0.05         | 2.2   | 10.4                 | 10.0                | -4.29                        |
| 6  | 9.50 | 0.05         | 2.2   | 11.9                 | 11.2                | -6.82                        |
| 7  | 4.50 | 0.15         | 2.2   | 8.56                 | 8.80                | 2.73                         |
| 8  | 9.50 | 0.15         | 2.2   | 9.66                 | 9.92                | 2.56                         |
| 9  | 2.80 | 0.10         | 1.5   | 6.47                 | 7.07                | 8.52                         |
| 10 | 11.2 | 0.10         | 1.5   | 8.61                 | 9.59                | 10.3                         |
| 11 | 7.00 | 0.02         | 1.5   | 12.3                 | 14.1                | 12.8                         |
| 12 | 7.00 | 0.18         | 1.5   | 8.35                 | 8.14                | -2.59                        |
| 13 | 7.00 | 0.10         | 0.32  | 7.84                 | 9.55                | 17.9                         |
| 14 | 7.00 | 0.10         | 2.7   | 11.2                 | 11.1                | -1.13                        |
| 15 | 7.00 | 0.10         | 1.5   | 8.45                 | 9.02                | 6.30                         |
| 16 | 7.00 | 0.10         | 1.5   | 8.45                 | 8.72                | 3.09                         |
| 17 | 7.00 | 0.10         | 1.5   | 8.45                 | 7.39                | -14.4                        |
| 18 | 7.00 | 0.10         | 1.5   | 8.45                 | 7.67                | -10.2                        |
| 19 | 7.00 | 0.10         | 1.5   | 8.45                 | 8.77                | 3.64                         |
| 20 | 7.00 | 0.10         | 1.5   | 8.45                 | 8.87                | 4.70                         |

**Table S5.** Experimental data and response surface predicted values of the factorial planning for RuBisCOs' concentration using [Ch][Ac] aqueous solutions.

| Nº | pH   | S/L<br>RATIO | C (M) | Predicted<br>Results | Observed<br>Results | Relative<br>deviation<br>(%) |
|----|------|--------------|-------|----------------------|---------------------|------------------------------|
| 1  | 4.50 | 0.05         | 0.80  | 0.074                | 0.000               |                              |
| 2  | 9.50 | 0.05         | 0.80  | 0.412                | 0.482               | 14.4                         |
| 3  | 4.50 | 0.15         | 0.80  | 0.260                | 0.000               |                              |
| 4  | 9.50 | 0.15         | 0.80  | 1.622                | 1.516               | -6.99                        |
| 5  | 4.50 | 0.05         | 2.2   | 0.093                | 0.000               |                              |
| 6  | 9.50 | 0.05         | 2.2   | 0.427                | 0.488               | 12.5                         |
| 7  | 4.50 | 0.15         | 2.2   | 0.268                | 0.000               |                              |
| 8  | 9.50 | 0.15         | 2.2   | 1.625                | 1.500               | -8.34                        |
| 9  | 2.80 | 0.10         | 1.5   | -0.317               | 0.000               |                              |
| 10 | 11.2 | 0.10         | 1.5   | 1.109                | 1.073               | -3.36                        |
| 11 | 7.00 | 0.02         | 1.5   | 0.074                | 0.000               |                              |
| 12 | 7.00 | 0.18         | 1.5   | 1.238                | 1.594               | 22.3                         |
| 13 | 7.00 | 0.10         | 0.32  | 0.757                | 0.882               | 14.1                         |
| 14 | 7.00 | 0.10         | 2.7   | 0.776                | 0.933               | 16.8                         |
| 15 | 7.00 | 0.10         | 1.5   | 0.749                | 0.740               | -1.19                        |
| 16 | 7.00 | 0.10         | 1.5   | 0.749                | 0.832               | 10.0                         |
| 17 | 7.00 | 0.10         | 1.5   | 0.749                | 0.802               | 6.60                         |
| 18 | 7.00 | 0.10         | 1.5   | 0.749                | 0.640               | -16.9                        |
| 19 | 7.00 | 0.10         | 1.5   | 0.749                | 0.720               | -4.03                        |
| 20 | 7.00 | 0.10         | 1.5   | 0.749                | 0.710               | -5.46                        |

**Table S6.** Experimental data and response surface predicted values of the factorial planning for RuBisCOs' extraction yield using [Ch][Ac] aqueous solutions.

| Nº | pH   | S/L<br>RATIO | C (M) | Predicted<br>Results | Observed<br>Results | Relative<br>deviation<br>(%) |
|----|------|--------------|-------|----------------------|---------------------|------------------------------|
| 1  | 4.50 | 0.05         | 0.80  | 0.280                | 0.00                |                              |
| 2  | 9.50 | 0.05         | 0.80  | 7.95                 | 8.79                | 9.56                         |
| 3  | 4.50 | 0.15         | 0.80  | 2.18                 | 0.00                |                              |
| 4  | 9.50 | 0.15         | 0.80  | 10.8                 | 9.94                | -8.73                        |
| 5  | 4.50 | 0.05         | 2.2   | 0.400                | 0.00                |                              |
| 6  | 9.50 | 0.05         | 2.2   | 8.09                 | 9.00                | 10.2                         |
| 7  | 4.50 | 0.15         | 2.2   | 2.11                 | 0.00                |                              |
| 8  | 9.50 | 0.15         | 2.2   | 10.8                 | 9.76                | -10.1                        |
| 9  | 2.80 | 0.10         | 1.5   | -2.34                | 0.00                |                              |
| 10 | 11.2 | 0.10         | 1.5   | 11.4                 | 10.8                | -5.10                        |
| 11 | 7.00 | 0.02         | 1.5   | 1.75                 | 0.500               | -250                         |
| 12 | 7.00 | 0.18         | 1.5   | 5.60                 | 8.65                | 35.3                         |
| 13 | 7.00 | 0.10         | 0.32  | 8.06                 | 8.93                | 9.73                         |
| 14 | 7.00 | 0.10         | 2.7   | 8.11                 | 9.04                | 10.3                         |
| 15 | 7.00 | 0.10         | 1.5   | 7.14                 | 7.43                | 3.96                         |
| 16 | 7.00 | 0.10         | 1.5   | 7.14                 | 6.98                | -2.28                        |
| 17 | 7.00 | 0.10         | 1.5   | 7.14                 | 7.69                | 7.18                         |
| 18 | 7.00 | 0.10         | 1.5   | 7.14                 | 6.29                | -13.4                        |
| 19 | 7.00 | 0.10         | 1.5   | 7.14                 | 7.22                | 1.11                         |
| 20 | 7.00 | 0.10         | 1.5   | 7.14                 | 6.90                | -3.43                        |

**Table S7.** Regression coefficients of the predicted second-order polynomial model for the RuBisCOs' concentration from RSM using [Ch]Cl aqueous solutions,  $R^2 = 0.95197$  and  $r_{adj.} = 0.90875$ .

|                                          | Regression<br>Coefficients | Standard<br>deviation | t-student<br>(10) | p-value |
|------------------------------------------|----------------------------|-----------------------|-------------------|---------|
| Interception                             | 0.3896                     | 0.4504                | 0.8649            | 0.4074  |
| pH                                       | 0.0097                     | 0.0769                | 0.1261            | 0.9021  |
| pH <sup>2</sup>                          | -0.0024                    | 0.0044                | -0.5342           | 0.6049  |
| Solid-liquid Ratio                       | 6.583                      | 3.491                 | 1.886             | 0.0886  |
| Solid-liquid Ratio <sup>2</sup>          | -1.257                     | 11.12                 | -0.1130           | 0.9122  |
| IL Concentration                         | -0.4671                    | 0.2534                | -1.843            | 0.0951  |
| IL Concentration <sup>2</sup>            | 0.1067                     | 0.0567                | 1.880             | 0.0895  |
| pH x Solid-liquid Ratio                  | 0.2366                     | 0.2983                | 0.7932            | 0.4461  |
| pH x IL Concentration                    | 0.0172                     | 0.0213                | 0.8084            | 0.4377  |
| Solid-liquid Ratio x IL<br>Concentration | -0.1247                    | 1.065                 | -0.1170           | 0.9092  |

**Table S8.** Effects of the variables in the second-order polynomial model for the extraction RuBisCO concentration using [Ch]Cl aqueous solutions.

|                                                  | <b>Regression<br/>Coefficients</b> | <b>Standard<br/>deviation</b> | <b>t-student<br/>(10)</b> | <b>p-value</b> |
|--------------------------------------------------|------------------------------------|-------------------------------|---------------------------|----------------|
| <b>Interception</b>                              | 0.8540                             | 0.0430                        | 19.85                     | 0.0000         |
| <b>pH</b>                                        | 0.1297                             | 0.0571                        | 2.271                     | 0.0465         |
| <b>pH<sup>2</sup></b>                            | -0.0297                            | 0.0556                        | -0.5342                   | 0.6049         |
| <b>Solid-liquid Ratio</b>                        | 0.7801                             | 0.0571                        | 13.66                     | 0.0000         |
| <b>Solid-liquid Ratio<sup>2</sup></b>            | -0.0063                            | 0.0556                        | -0.1130                   | 0.9122         |
| <b>IL Concentration</b>                          | -0.0545                            | 0.0571                        | -0.9546                   | 0.3623         |
| <b>IL Concentration<sup>2</sup></b>              | 0.1045                             | 0.0556                        | 1.880                     | 0.0895         |
| <b>pH x Solid-liquid Ratio</b>                   | 0.0592                             | 0.0746                        | 0.7932                    | 0.4461         |
| <b>pH x IL Concentration</b>                     | 0.0603                             | 0.0746                        | 0.8084                    | 0.4377         |
| <b>Solid-liquid Ratio x IL<br/>Concentration</b> | -0.0087                            | 0.0746                        | -0.1170                   | 0.9092         |

**Table S9.** Regression coefficients of the predicted second-order polynomial model for the RuBisCOs' extraction yield from RSM using [Ch]Cl aqueous solutions,  $R^2 = 0.75851$  and  $r_{adj.} = 0.54116$ .

|                                                  | <b>Regression<br/>Coefficients</b> | <b>Standard<br/>deviation</b> | <b>t-student<br/>(10)</b> | <b>p-value</b> |
|--------------------------------------------------|------------------------------------|-------------------------------|---------------------------|----------------|
| <b>Interception</b>                              | 8.737                              | 5.258                         | 1.662                     | 0.1276         |
| <b>pH</b>                                        | 1.043                              | 0.8981                        | 1.161                     | 0.2726         |
| <b>pH<sup>2</sup></b>                            | -0.0518                            | 0.0519                        | -0.9967                   | 0.3424         |
| <b>Solid-liquid Ratio</b>                        | -75.50                             | 40.75                         | -1.853                    | 0.0936         |
| <b>Solid-liquid Ratio<sup>2</sup></b>            | 262.2                              | 129.8                         | 2.020                     | 0.0710         |
| <b>IL Concentration</b>                          | -1.267                             | 2.958                         | -0.4283                   | 0.6775         |
| <b>IL Concentration<sup>2</sup></b>              | 0.7607                             | 0.6624                        | 1.149                     | 0.2775         |
| <b>pH x Solid-liquid Ratio</b>                   | -0.7645                            | 3.483                         | -0.2195                   | 0.8306         |
| <b>pH x IL Concentration</b>                     | 0.0080                             | 0.2487                        | 0.0320                    | 0.9751         |
| <b>Solid-liquid Ratio x IL<br/>Concentration</b> | 3.471                              | 12.44                         | 0.2791                    | 0.7859         |

**Table S10.** Effects of the variables in the second-order polynomial model for the extraction yield of RuBisCO using [Ch]Cl aqueous solutions.

|                                       | Regression Coefficients | Standard deviation | t-student (10) | p-value |
|---------------------------------------|-------------------------|--------------------|----------------|---------|
| Interception                          | 8.453                   | 0.5021             | 16.83          | 0.0000  |
| pH                                    | 1.269                   | 0.6665             | 1.903          | 0.0862  |
| pH <sup>2</sup>                       | -0.6470                 | 0.6491             | -0.9967        | 0.3424  |
| Solid-liquid Ratio                    | -2.320                  | 0.6665             | -3.481         | 0.0059  |
| Solid-liquid Ratio <sup>2</sup>       | 1.311                   | 0.6491             | 2.020          | 0.0710  |
| IL Concentration                      | 1.985                   | 0.6665             | 2.978          | 0.0139  |
| IL Concentration <sup>2</sup>         | 0.7455                  | 0.6491             | 1.148          | 0.2775  |
| pH x Solid-liquid Ratio               | -0.1911                 | 0.8706             | -0.2195        | 0.8306  |
| pH x IL Concentration                 | 0.0279                  | 0.8706             | 0.0320         | 0.9751  |
| Solid-liquid Ratio x IL Concentration | 0.2430                  | 0.8706             | 0.2791         | 0.7859  |

**Table S11.** Regression coefficients of the predicted second-order polynomial model for the RuBisCOs' concentration from RSM using [Ch][Ac] aqueous solutions, R<sup>2</sup> = 0.90873 and r<sub>adj.</sub> = 0.82659.

|                                       | Regression Coefficients | Standard deviation | t-student (10) | p-value |
|---------------------------------------|-------------------------|--------------------|----------------|---------|
| Interception                          | -0.8088                 | 0.9426             | -0.8580        | 0.4110  |
| pH                                    | 0.2453                  | 0.1610             | 1.524          | 0.1586  |
| pH <sup>2</sup>                       | -0.0200                 | 0.0093             | -2.144         | 0.0577  |
| Solid-liquid Ratio                    | -4.665                  | 7.305              | -0.6386        | 0.5374  |
| Solid-liquid Ratio <sup>2</sup>       | -13.08                  | 23.27              | -0.5620        | 0.5865  |
| IL Concentration                      | -0.0179                 | 0.5303             | -0.0338        | 0.9737  |
| IL Concentration <sup>2</sup>         | 0.0128                  | 0.1187             | 0.1079         | 0.9162  |
| pH x Solid-liquid Ratio               | 2.046                   | 0.6243             | 3.277          | 0.0083  |
| pH x IL Concentration                 | -0.0006                 | 0.0446             | -0.0145        | 0.9887  |
| Solid-liquid Ratio x IL Concentration | -0.0793                 | 2.230              | -0.0356        | 0.9723  |



**Table S12.** Effects of the variables in the second-order polynomial model for the RuBisCO concentration using [Ch][Ac] aqueous solutions.

|                                       | Regression Coefficients | Standard deviation | t-student (10) | p-value |
|---------------------------------------|-------------------------|--------------------|----------------|---------|
| Interception                          | 0.7488                  | 0.0900             | 8.318          | 0.0000  |
| pH                                    | 0.8479                  | 0.1195             | 7.097          | 0.0000  |
| pH <sup>2</sup>                       | -0.2494                 | 0.1164             | -2.144         | 0.0577  |
| Solid-liquid Ratio                    | 0.6922                  | 0.1195             | 5.794          | 0.0002  |
| Solid-liquid Ratio <sup>2</sup>       | -0.0654                 | 0.1164             | -0.5620        | 0.5865  |
| IL Concentration                      | 0.0113                  | 0.1195             | 0.0948         | 0.9264  |
| IL Concentration <sup>2</sup>         | 0.0126                  | 0.1164             | 0.1079         | 0.9162  |
| pH x Solid-liquid Ratio               | 0.5115                  | 0.1561             | 3.277          | 0.0083  |
| pH x IL Concentration                 | -0.0023                 | 0.1561             | -0.0145        | 0.9887  |
| Solid-liquid Ratio x IL Concentration | -0.0056                 | 0.1561             | -0.0356        | 0.9723  |

**Table S13.** Regression coefficients of the predicted second-order polynomial model for the RuBisCOs' extraction yield from RSM using [Ch][Ac] aqueous solutions, R<sup>2</sup> = 0.89709 and r<sub>adj</sub> = 0.80447.

|                                       | Regression Coefficients | Standard deviation | t-student (10) | p-value |
|---------------------------------------|-------------------------|--------------------|----------------|---------|
| Interception                          | -16.01                  | 7.663              | -2.097         | 0.0624  |
| pH                                    | 3.510                   | 1.309              | 2.682          | 0.0230  |
| pH <sup>2</sup>                       | -0.1482                 | 0.0757             | -1.958         | 0.0787  |
| Solid-liquid Ratio                    | 109.5                   | 59.39              | 1.844          | 0.0950  |
| Solid-liquid Ratio <sup>2</sup>       | -489.8                  | 189.2              | -2.589         | 0.0270  |
| IL Concentration                      | -1.905                  | 4.311              | -0.4418        | 0.6680  |
| IL Concentration <sup>2</sup>         | 0.6838                  | 0.9653             | 0.7083         | 0.4949  |
| pH x Solid-liquid Ratio               | 1.918                   | 5.075              | 0.3779         | 0.7134  |
| pH x IL Concentration                 | 0.0025                  | 0.3625             | 0.0069         | 0.9946  |
| Solid-liquid Ratio x IL Concentration | -1.407                  | 18.13              | -0.0776        | 0.9396  |

**Table S14.** Effects of the variables in the second-order polynomial model for the extraction yield of RuBisCO using [Ch][Ac] aqueous solutions.

|                                       | Regression Coefficients | Standard deviation | t-student (10) | p-value |
|---------------------------------------|-------------------------|--------------------|----------------|---------|
| Interception                          | 7.137                   | 0.7318             | 9.752          | 0.0000  |
| pH                                    | 8.158                   | 0.9713             | 8.399          | 0.0000  |
| pH <sup>2</sup>                       | -1.852                  | 0.9460             | -1.958         | 0.0787  |
| Solid-liquid Ratio                    | 2.287                   | 0.9713             | 2.354          | 0.0404  |
| Solid-liquid Ratio <sup>2</sup>       | -2.449                  | 0.9460             | -2.589         | 0.0270  |
| IL Concentration                      | 0.0326                  | 0.9713             | 0.0336         | 0.9739  |
| IL Concentration <sup>2</sup>         | 0.6701                  | 0.9460             | 0.7083         | 0.4949  |
| pH x Solid-liquid Ratio               | 0.4795                  | 1.269              | 0.3779         | 0.7134  |
| pH x IL Concentration                 | 0.0088                  | 1.269              | 0.0069         | 0.9946  |
| Solid-liquid Ratio x IL Concentration | -0.0985                 | 1.269              | -0.0776        | 0.9396  |

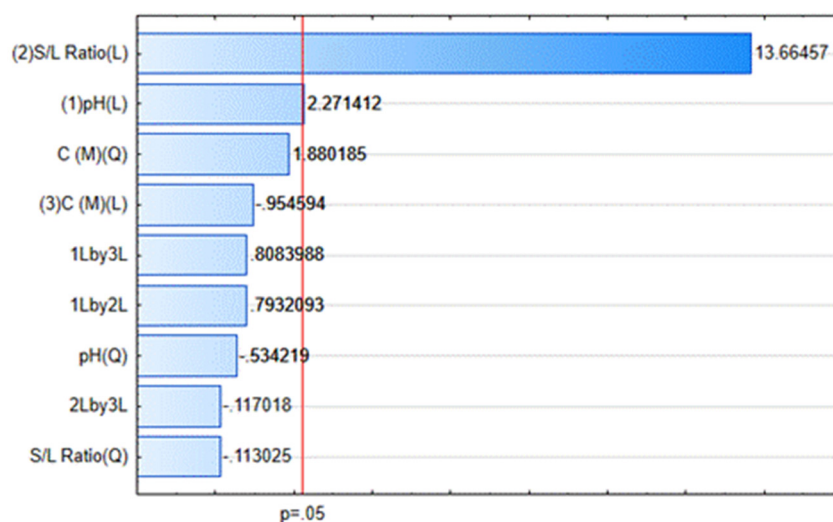

**Figure S8.** Pareto charts for the standardized main effects in the factorial planning with [Ch]Cl for RuBisCOs' concentration. The vertical line indicates the statistical significance of the effects.

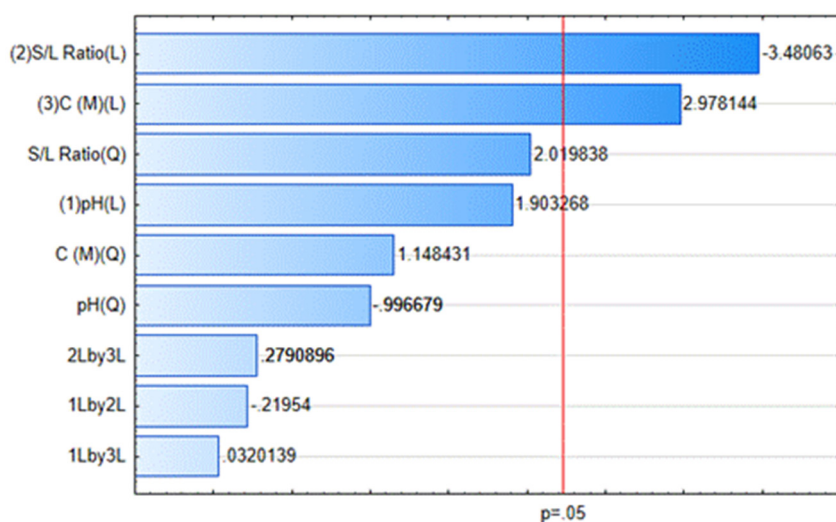

**Figure S9.** Pareto charts for the standardized main effects in the factorial planning with [Ch]Cl for RuBisCOs' extraction yield. The vertical line indicates the statistical significance of the effects.

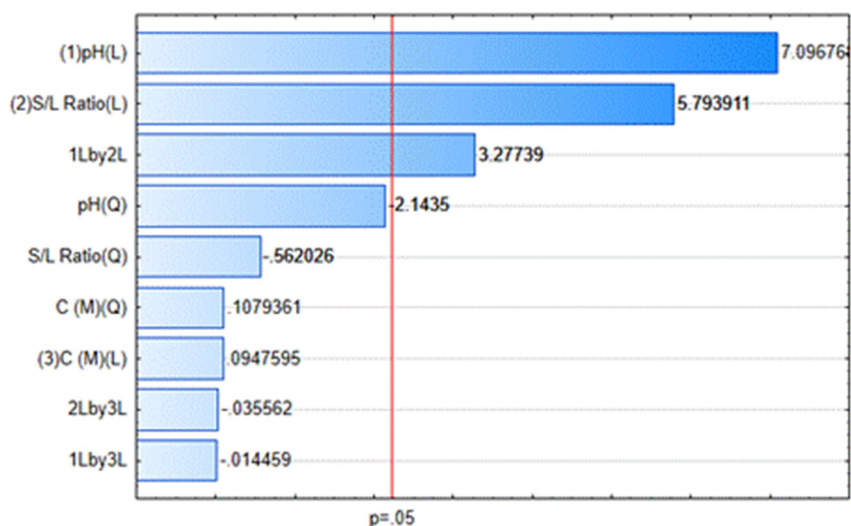

**Figure S10.** Pareto charts for the standardized main effects in the factorial planning with [Ch][Ac] for RuBisCOs' concentration. The vertical line indicates the statistical significance of the effects.

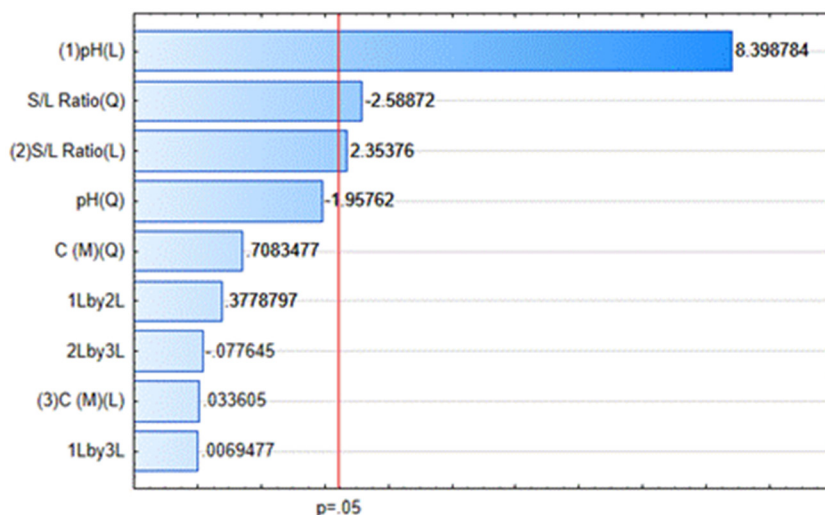

**Figure S11.** Pareto charts for the standardized main effects in the factorial planning with [Ch][Ac] for RuBisCOs' extraction yield. The vertical line indicates the statistical significance of the effects.

**Table S15.** ANOVA data for RuBisCO concentration when using [Ch]Cl aqueous solutions.

|            | Sums of squares | Degrees of freedom | Mean square | F-value | p-value  |
|------------|-----------------|--------------------|-------------|---------|----------|
| Regression | 2.20            | 9.00               | 0.2450      | 22.02   | 0.000019 |
| Residuals  | 0.11            | 10.0               | 0.0110      |         |          |
| Total      | 2.32            |                    |             |         |          |

**Table S16.** ANOVA data for the extraction yield of RuBisCO when using [Ch]Cl aqueous solutions.

|            | Sums of squares | Degrees of freedom | Mean square | F-value | p-value |
|------------|-----------------|--------------------|-------------|---------|---------|
| Regression | 47.61           | 9.00               | 5.291       | 3.490   | 0.0322  |
| Residuals  | 15.16           | 10.0               | 1.516       |         |         |
| Total      | 62.77           |                    |             |         |         |

**Table S17.** ANOVA data for RuBisCO concentration when using [Ch][Ac] aqueous solutions.

|            | Sums of squares | Degrees of freedom | Mean square | F-value | p-value |
|------------|-----------------|--------------------|-------------|---------|---------|
| Regression | 4.850           | 9.00               | 0.5400      | 11.06   | 0.00    |
| Residuals  | 0.490           | 10.0               | 0.0500      |         |         |
| Total      | 5.340           |                    |             |         |         |

**Table S18.** ANOVA data for the extraction yield of RuBisCO when using [Ch][Ac] aqueous solutions.

|            | Sums of squares | of Degrees of freedom | Mean square | F-value | p-value |
|------------|-----------------|-----------------------|-------------|---------|---------|
| Regression | 280.7           | 9.00                  | 31.19       | 9.686   | 0.0007  |
| Residuals  | 32.20           | 10.0                  | 3.220       |         |         |
| Total      | 312.9           |                       |             |         |         |

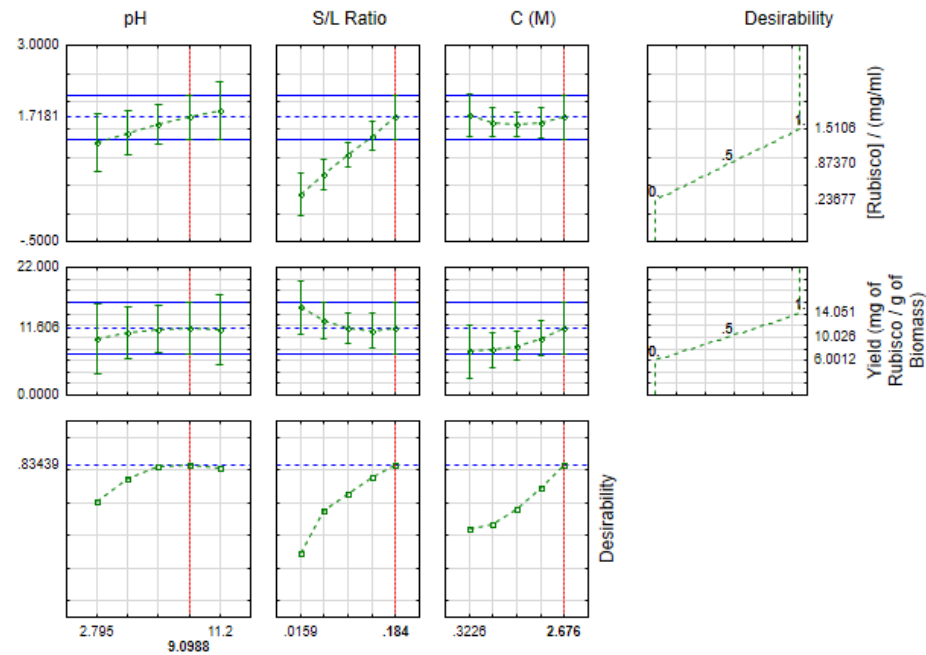

**Figure S12.** Profiles for predicted values and desirability in the factorial planning for both dependent variables with [Ch]Cl aqueous solutions.

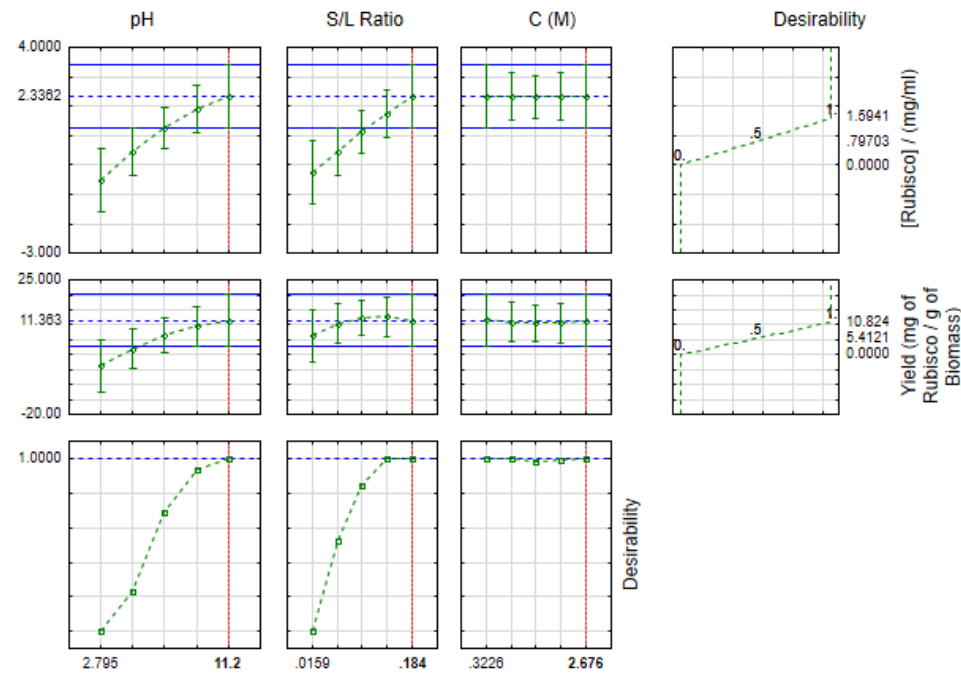

**Figure S13.** Profiles for predicted values and desirability in the factorial planning for both dependent variables with [Ch][Ac] aqueous solutions.
